# Supplementary material
Source: publisher site journal article supplement (https://www.dovepress.com/get_supplementary_file.php?f=325235a.xlsx)
Supplement: Supplementary file 1 [file get_supplementary_file.php]

## Sheet: WLGP
WLGP Negative Binomial regression with interaction WIMD*YEAR
Characteristic	IRR1	95% CI1	p-value
GENDER_CHAR
female	Ref	Ref
male	1.19	1.14, 1.25	<0.001
AGE_CHAR
a_11_14	Ref	Ref
b_15_17	8.1	6.83, 9.61	<0.001
c_18_21	21.9	18.6, 25.7	<0.001
d_22_25	24.9	21.2, 29.3	<0.001
WIMD_CHAR
1_least	Ref	Ref
2_least	1.47	1.08, 1.99	0.013
3_least	2.07	1.56, 2.75	<0.001
4_least	2.96	2.26, 3.89	<0.001
5_most	4.5	3.47, 5.83	<0.001
na	0.67	0.21, 2.12	0.493
YEAR_CHAR
yr2008	Ref	Ref
yr2009	1.07	0.78, 1.46	0.578
yr2010	1.2	0.88, 1.63	0.2418
yr2011	1.03	0.75, 1.41	0.8716
yr2012	1.04	0.76, 1.42	0.8151
yr2013	1.04	0.75, 1.42	0.8238
yr2014	1.1	0.80, 1.51	0.5488
yr2015	0.99	0.72, 1.36	0.9438
yr2016	1.22	0.89, 1.66	0.2097
yr2017	1.38	1.02, 1.88	0.0378
WIMD_CHAR * YEAR_CHAR
2_least * yr2009	1.14	0.75, 1.73	0.5497
3_least * yr2009	1.07	0.72, 1.58	0.7466
4_least * yr2009	0.86	0.59, 1.26	0.444
5_most * yr2009	0.9	0.63, 1.30	0.583
na * yr2009	0.9	0.18, 4.62	0.9008
2_least * yr2010	0.87	0.57, 1.33	0.5232
3_least * yr2010	0.86	0.58, 1.28	0.4638
4_least * yr2010	0.82	0.56, 1.19	0.291
5_most * yr2010	0.74	0.52, 1.06	0.1041
na * yr2010	0.26	0.03, 2.55	0.246
2_least * yr2011	0.98	0.64, 1.51	0.9326
3_least * yr2011	0.88	0.59, 1.32	0.5409
4_least * yr2011	0.93	0.63, 1.37	0.7186
5_most * yr2011	0.76	0.52, 1.09	0.1385
na * yr2011	1.14	0.25, 5.30	0.8668
2_least * yr2012	1.08	0.71, 1.66	0.7168
3_least * yr2012	0.89	0.60, 1.34	0.5885
4_least * yr2012	0.85	0.58, 1.25	0.4003
5_most * yr2012	0.79	0.55, 1.14	0.2072
na * yr2012	0.5	0.08, 3.09	0.4547
2_least * yr2013	1.1	0.72, 1.68	0.669
3_least * yr2013	1.03	0.69, 1.54	0.874
4_least * yr2013	0.82	0.55, 1.21	0.3089
5_most * yr2013	0.84	0.58, 1.22	0.361
na * yr2013	0	0.00, Inf	1
2_least * yr2014	0.93	0.60, 1.42	0.7329
3_least * yr2014	0.86	0.58, 1.29	0.478
4_least * yr2014	0.83	0.56, 1.21	0.3308
5_most * yr2014	0.64	0.44, 0.93	0.019766
na * yr2014	0.6	0.12, 3.06	0.5347
2_least * yr2015	0.87	0.56, 1.36	0.5494
3_least * yr2015	0.94	0.63, 1.42	0.7803
4_least * yr2015	0.99	0.67, 1.47	0.975
5_most * yr2015	0.75	0.52, 1.10	0.1387
na * yr2015	0.78	0.17, 3.65	0.756
2_least * yr2016	1.01	0.67, 1.54	0.9475
3_least * yr2016	0.75	0.50, 1.12	0.1656
4_least * yr2016	0.63	0.43, 0.93	0.02
5_most * yr2016	0.52	0.36, 0.76	<0.001
na * yr2016	0.24	0.04, 1.45	0.1191
2_least * yr2017	0.81	0.53, 1.23	0.3197
3_least * yr2017	0.7	0.47, 1.03	0.072
4_least * yr2017	0.57	0.39, 0.84	0.004
5_most * yr2017	0.48	0.34, 0.70	<0.001
na * yr2017	0.31	0.07, 1.45	0.137
